# Supplementary material for: Preparation and structural characterization of a novel dicopper(ii) complex with a terminal hydroxide: a structural model of an active site in phosphohydrolasesElectronic supplementary information (ESI) available: the effective magnetic moments and the molar magnetic susceptibilities of 1, the positive ion electrospray ionization mass spectrum of [CuII2(TNPDO)(OH)(F)]+ and the structure of HTNPDO. See http://www.rsc.org/suppdata/dt/b3/b303787h/
Source: Royal Society of Chemistry journal article supplement (doi:10.1039/b303787h), 2003-01-01
Supplement: b303787h.pdf [file b303787h.pdf]

## Supplementary Information

### Preparation and Structural Characterization of A Novel Dicopper(II) Complex with a Terminal Hydroxide. Structural Model of an Active Site in Phosphohydrolases

Hidekazu Arie, Yasuhiro Funahashi, Koichiro Jitsukawa and Hideki Masuda\*

Department of Applied Chemistry, Nagoya Institute of Technology.

Contents.

**Fig. S1** The effective magnetic moments of **1** depended on temperature from 300 K to 20 K.

**Fig. S2** The molar magnetic susceptibilities of **1** depended on temperature from 300 K to 20 K fitted using the modified Bleaney-Bowers equation.

**Fig. S3** Positive ion electrospray ionization mass spectrum of  $[\text{Cu}^{\text{II}}_2(\text{TNPDO})(\text{OH})(\text{F})]^+$ .

**Fig. S4** The spectral change of **1** (0.50 mM) from pH 3.9 to 9.6 in MeCN/H<sub>2</sub>O (with a 1/1 ratio) solution at the range of 300-600 nm.

**Scheme 1.** HTNPDO.

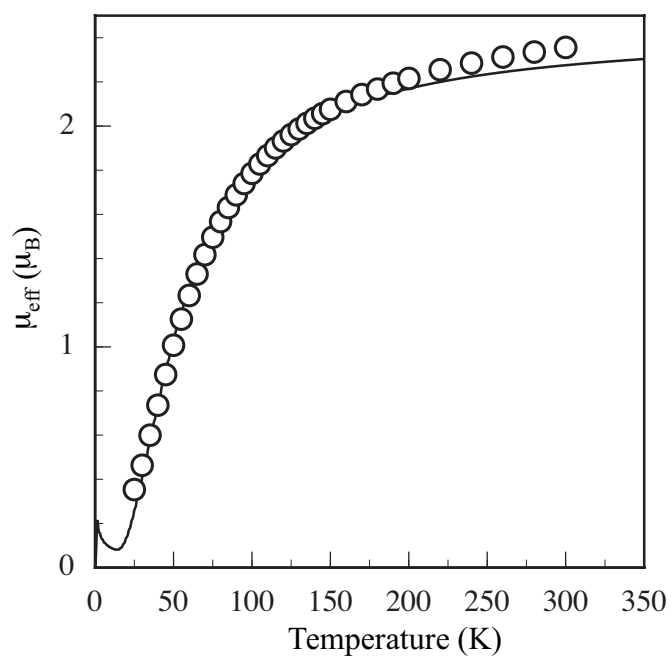

**Fig. S1** The effective magnetic moments of **1** depended on temperature from 300 K to 20 K.

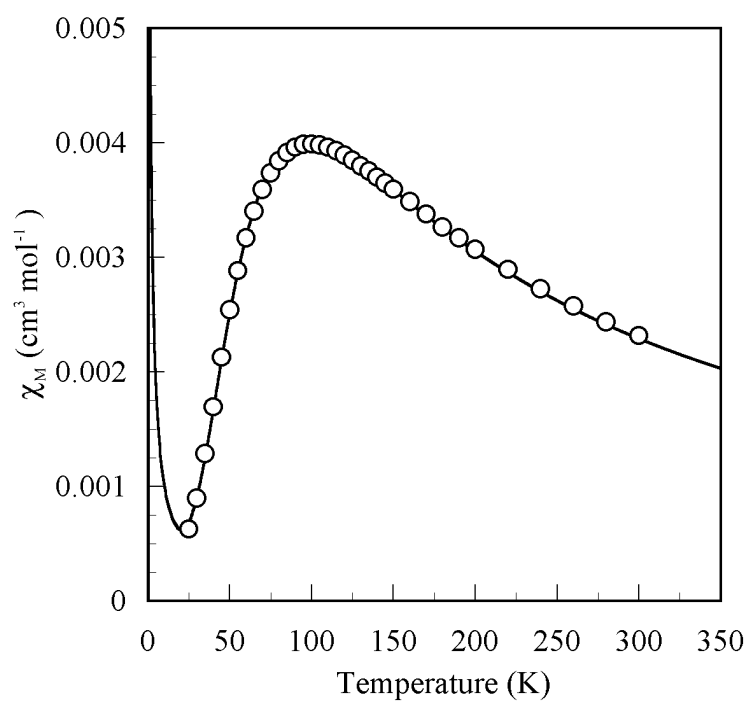

**Fig. S2** The molar magnetic susceptibilities of **1** depended on temperature from 300 K to 20 K fitted using the modified Bleaney-Bowers equation.

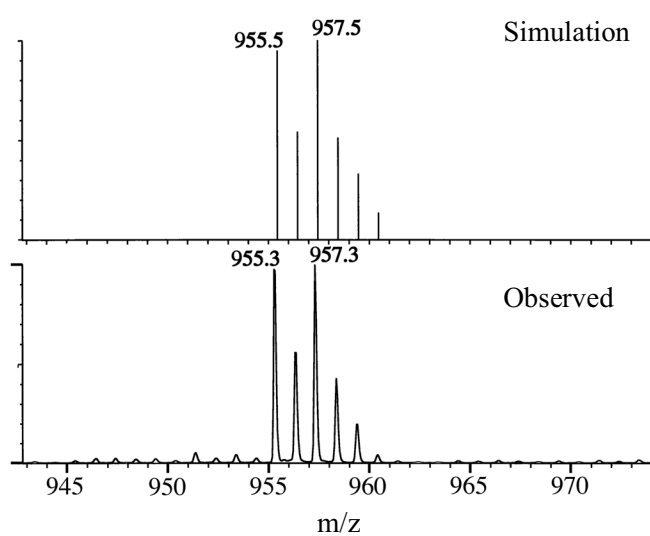

**Fig. S3** Positive ion electrospray ionization mass spectrum of  $[\text{Cu}^{\text{II}}_2(\text{TNPDO})(\text{OH})(\text{F})]^+$ .

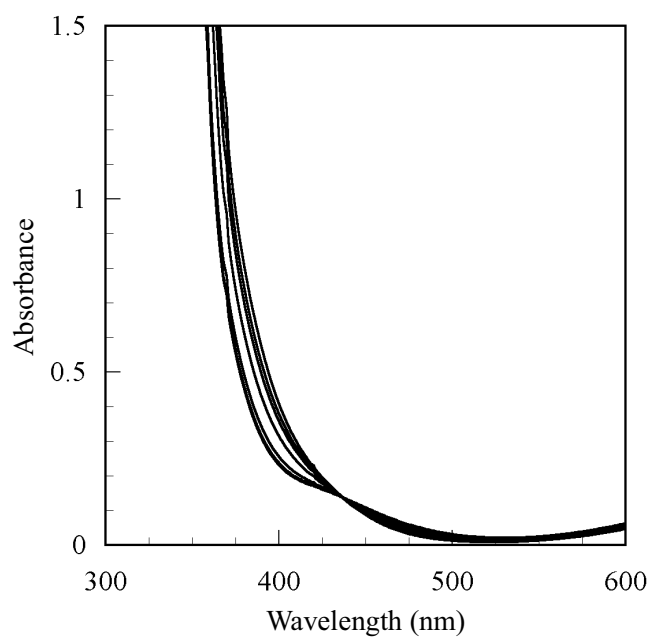

**Fig. S4** The spectral change of **1** (0.50 mM) from pH 3.9 to 9.6 in MeCN/H<sub>2</sub>O (with a 1/1 ratio) solution at the range of 300-600 nm.

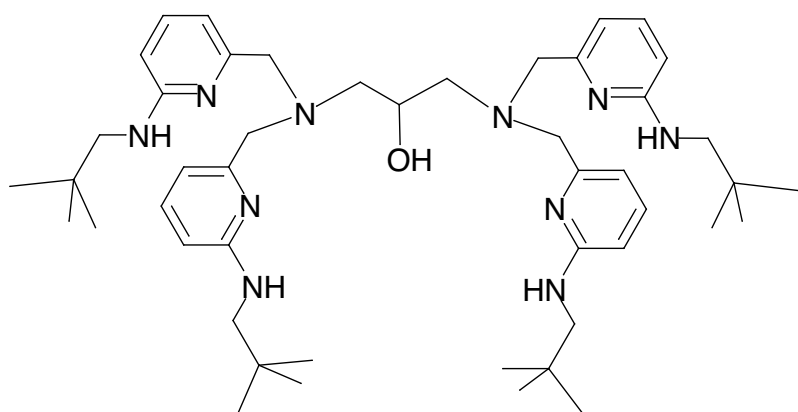

**Scheme 1.** HTNPDO.
